# Supplementary material for: Potential of Grain Legume Fallows to Address Food Insecurity and Boost Household Incomes in Western Kenya
Source: PLOS journal article supplement (doi:10.1371/journal.pone.0207761), 2014-01-01
Supplement: S1 (10.1371/journal.pone.0207761.s001) [file journal.pone.0207761.s001]

## Supporting Information. Neuronal Dynamics, firing patterns, LFP recordings, PSD and EC data.

Neuronal firings in this work were generated through modified differential equations stated in the manuscript. Table 1 in the manuscript shows the parametrization for these equations. The results of generated data can be found on:

[https://figshare.com/articles/supporting\\_data\\_mat/6177269](https://figshare.com/articles/supporting_data_mat/6177269).

All the generated data in this work are labeled according to Table S1 and are accessible via the above [link](#).

Table S1. Generated Data

|    | Neuron type                     | Corresponding equations | Matrix Label  | Matrix size        |
|----|---------------------------------|-------------------------|---------------|--------------------|
| 1  | Th Firings/Healthy              | (5)                     | VVth1         | $27 \times 100001$ |
| 2  | STN Firings/Healthy             | (7)                     | VVstn1        | $27 \times 100001$ |
| 3  | GPe Firings/Healthy             | (8)                     | VVgpe1        | $27 \times 100001$ |
| 4  | GPe Firings/Healthy             | (9)                     | VVgpi1        | $27 \times 100001$ |
| 5  | Th Firings/PD                   | (5)                     | VVth2         | $27 \times 100001$ |
| 6  | STN Firings/PD                  | (7)                     | VVstn2        | $27 \times 100001$ |
| 7  | GPe Firings/PD                  | (8)                     | VVgpe2        | $27 \times 100001$ |
| 8  | GPe Firings/PD                  | (9)                     | VVgpi2        | $27 \times 100001$ |
| 9  | LFP recordings                  | (10)                    | LFP_stn       | $1 \times 100001$  |
| 10 | Filtered and delayed LFP        | (11) and (13)           | LFP_m         | $1 \times 16401$   |
| 11 | Frequency modulated DBS signal  | (12)                    | I_DB          | $1 \times 16401$   |
| 12 | PSD of STN population/Healthy   |                         | PSD_H         | $8193 \times 1$    |
| 13 | PSD of STN population/PD        |                         | PSD_PD        | $8193 \times 1$    |
| 14 | PSD of STN population/FAS       |                         | PSD_FAS       | $8193 \times 1$    |
| 15 | PSD of STN population/Pulsatile |                         | PSD_Pulsatile | $8193 \times 1$    |
| 16 | PSD of STN population/HFS       |                         | PSD_HFS       | $8193 \times 1$    |
| 17 | PSD of STN population/VFS       |                         | PSD_VFS       | $8193 \times 1$    |
| 18 | Energy Consumed/FAS             | (18)                    | EC_FAS        | $1 \times 1001$    |
| 19 | Energy Consumed/Pulsatile       | (18)                    | EC_Pulsatile  | $1 \times 1001$    |
| 20 | Energy Consumed/HFS             | (18)                    | EC_HFS        | $1 \times 1001$    |
| 21 | Energy Consumed/VFS             | (18)                    | EC_VFS        | $1 \times 1001$    |

The labels of firing patterns under healthy and PD conditions of all cell types are shown in rows 1 through 8. Each nucleus is represented by a matrix of  $27 \times 100001$ , where each row represents one neuron and each column is the membrane voltage of that neuron at a specific time. The recorded LFP signal from the population of STN neurons is shown in row 9 and then this signal is filtered and delayed to define the control variable in row 10. The frequency of the DBS signal

is modulated according to the amplitude of the control signal (LFP\_m) and the label of I\_DBS can be seen in row 11. For clarity, only 16401 samples of LFP\_m and I\_DBS are shown. The power spectral densities (PSDs) of the LFP signal under various conditions are shown in rows 12 until 17. Finally, the energy consumed under different stimulation protocols are shown in rows 18 to 21.
